# Supplementary material for: Extremely efficient crystallization of HKUST-1 and Keggin-loaded related phases through the epoxide route
Source: Royal Society of Chemistry journal article supplement (doi:10.1039/c7cc00737j), 2017-01-01
Supplement: c7cc00737j1.pdf [file c7cc00737j1.pdf]

## Supporting Information

### Extremely efficient crystallization of HKUST-1 and keggin-loaded related phases through the epoxide's route

Víctor Oestreicher<sup>a</sup> and Matías Jobbágy<sup>a, b\*</sup>

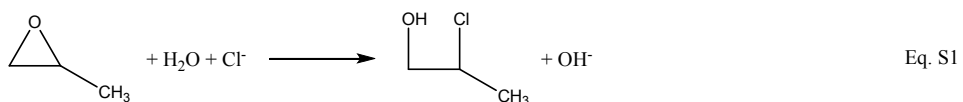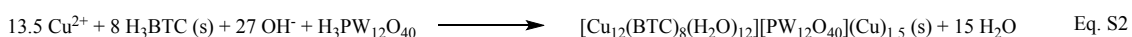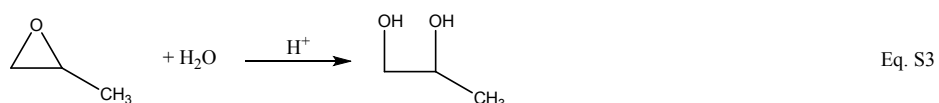

**Scheme S1.** Chloride attack and PO ring rupture driven alkalization (1), H<sub>3</sub>BTC/POM (H<sub>3</sub>PW<sub>12</sub>O<sub>40</sub> to exemplify) deprotonation and HKUST-1 precipitation (2) and parallel acid catalyzed PO hydrolysis (3).

**Table S1.** Initial molar content of reagents and solvent, on the basis of one mol of polyoxometalate (POM)

| CuCl <sub>2</sub> | H <sub>3</sub> BTC | PO | H <sub>2</sub> O | POM    | % Cu(II) as MOF* | STY kg m <sup>3</sup> day <sup>-1</sup> |
|-------------------|--------------------|----|------------------|--------|------------------|-----------------------------------------|
| 12                | 8                  | 30 | 216              | -      | 96,0±0,5         | 2,03 x 10 <sup>5</sup>                  |
| 12                | 8                  | 36 | 216              | -      | 99,5±0,5         | 2,10 x 10 <sup>5</sup>                  |
| 24                | 16                 | 60 | 216              | -      | 84,7±0,5         | 3,57 x 10 <sup>5</sup>                  |
| 24                | 16                 | 72 | 216              | -      | 98,0±0,5         | 4,14 x 10 <sup>5</sup>                  |
| 12                | 8                  | 36 | 216              | 1=PW   | 95,5±0,5         | 2,57 x 10 <sup>6</sup>                  |
| 12                | 8                  | 36 | 216              | 1=SiMo | 86,0±0,5         | 1,88 x 10 <sup>6</sup>                  |
| 12                | 8                  | 36 | 216              | 1=PMo  | 89,5±0,5         | 1,96 x 10 <sup>6</sup>                  |

\* In order to define the absolute precipitation yield the content of remnant Cu(II) in the washing solution was assessed by UV-Vis, after the addition of NH<sub>3</sub> excess.

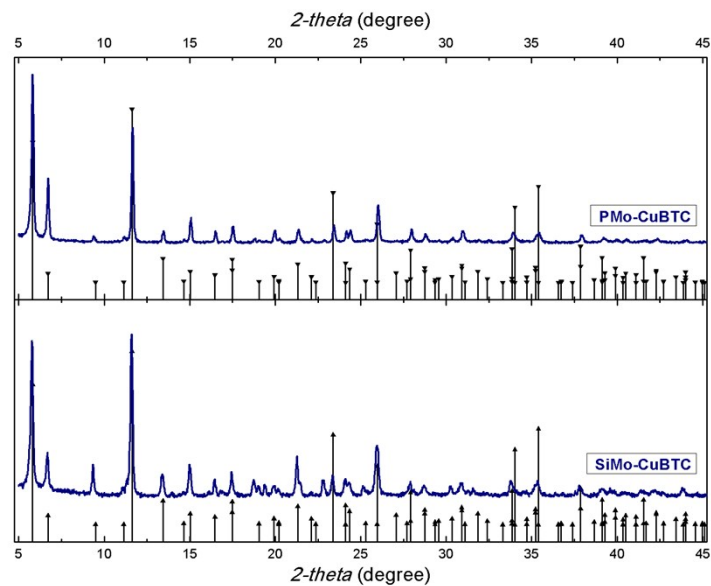

**Figure S1.** PXRD of sample PMo-CuBTC (upper pattern) and SiMo-CuBTC (lower pattern). Reference diffraction lines from NENU-5 and NENU-4 reference phases are also presented (C. Y. Sun, S. X. Liu, D. D. Liang, K. Z. Shao, Y. H. Ren and Z. M. Su, *J. Am. Chem. Soc.*, 2009, 131, 1883-1888.).

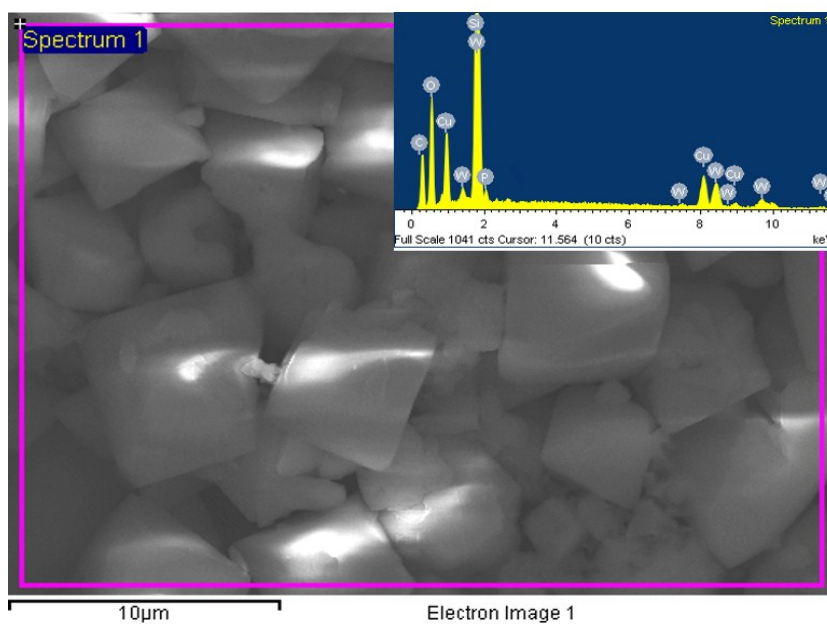

**Figure S2.** FESEM image and EDS spectrum of sample PW-CuBTC. Expected ratio Cu:W:P=13.5:12:1; obtained ratio Cu:W:P=13.5±0.4:12.0±0.6:1.0±0.1.

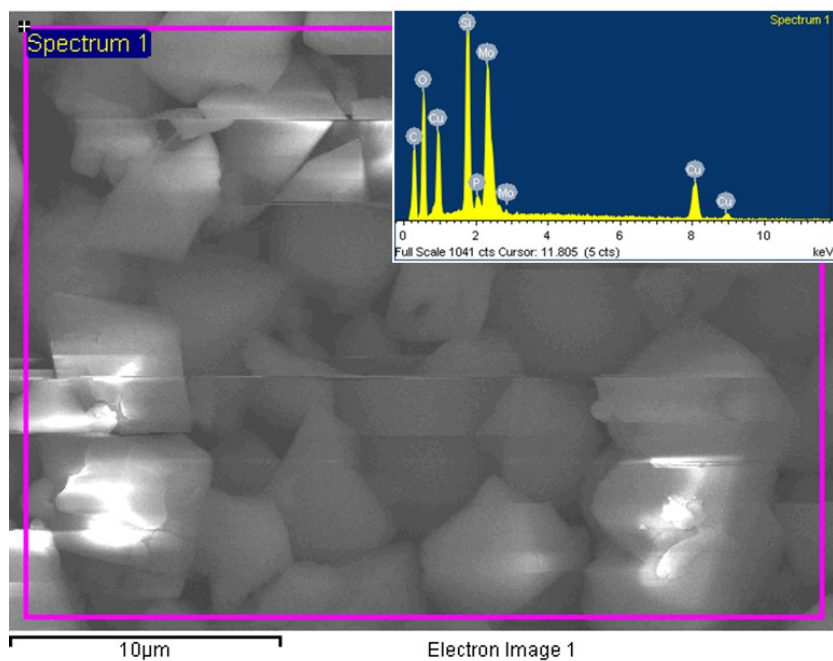

**Figure S3.** FESEM image and EDS spectrum of sample PMo-CuBTC. Expected ratio Cu:Mo:P=14:12:1; obtained ratio Cu:Mo:P=14.0±0.4:12.3±0.6:1.1±0.1.

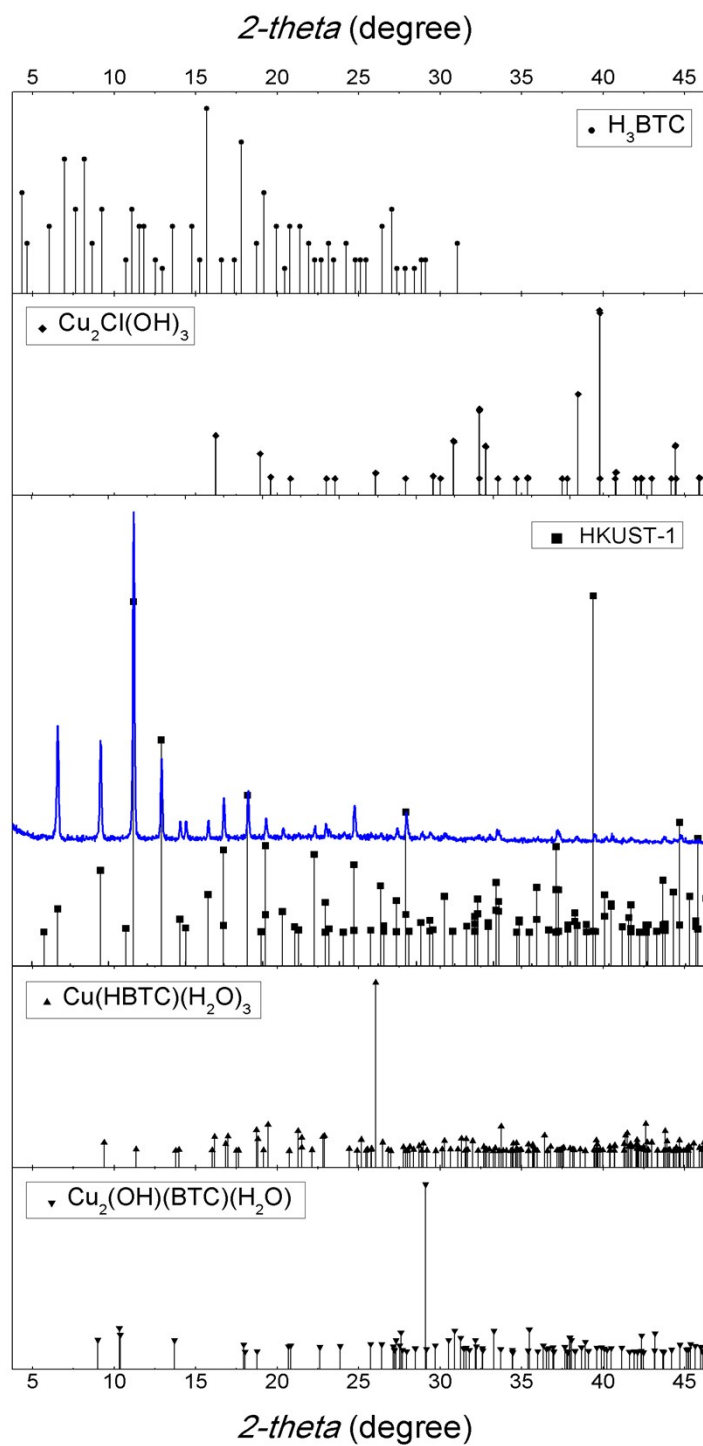

**Figure S4.** PXRD pattern of sample CuBTC (blue line) compared with reference lines of H-KUST, starting reagents and related compounds.

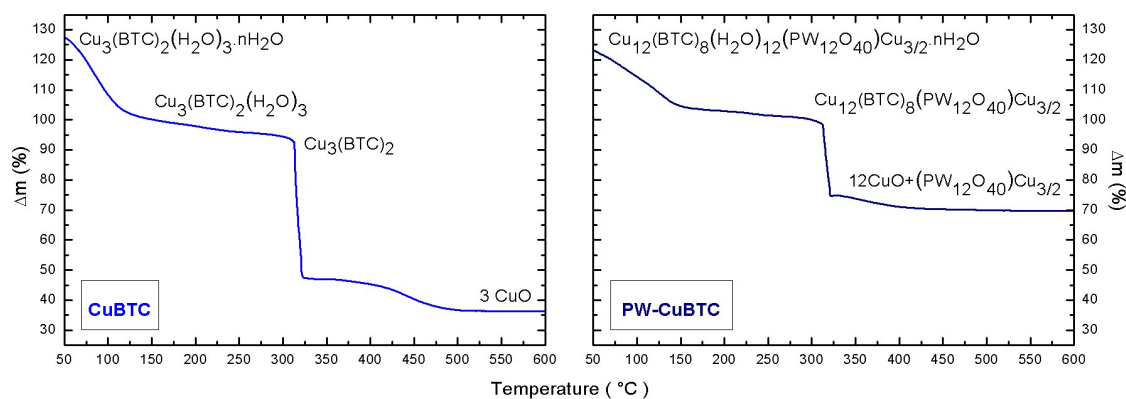

**Figure S5.** TGA trace (10 °C/min, air atmosphere) for samples CuBTC (left panel) and PW-CuBTC (right panel), including the compounds expected for each step along the thermal decomposition process.

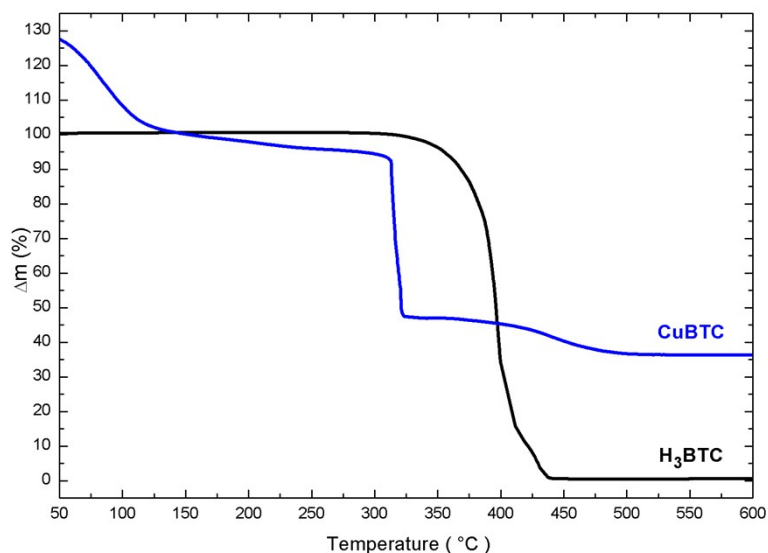

**Figure S6.** TGA trace (10 °C /min, air atmosphere) for sample CuBTC (blue line) and pure  $\text{H}_3\text{BTC}$  (black line).

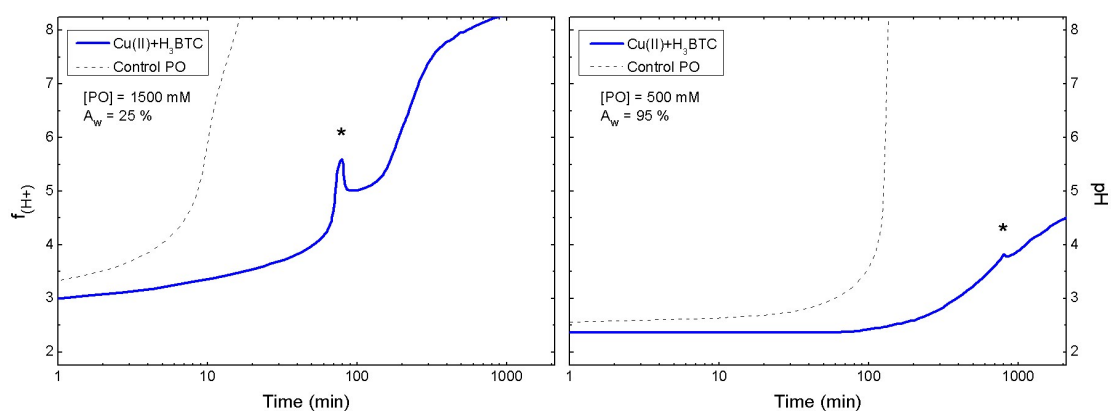

**Figure S7.** Evolution of pH as a function of time at 298 K for EtOH: $\text{H}_2\text{O}$  solutions containing PO,  $[\text{CuCl}_2]_0 = 5 \text{ mM}$  and  $[\text{H}_3\text{BTC}]_0 = 3.3 \text{ mM}$ . Asterisks represent the nucleation overshoot that triggers CuBTC precipitation.

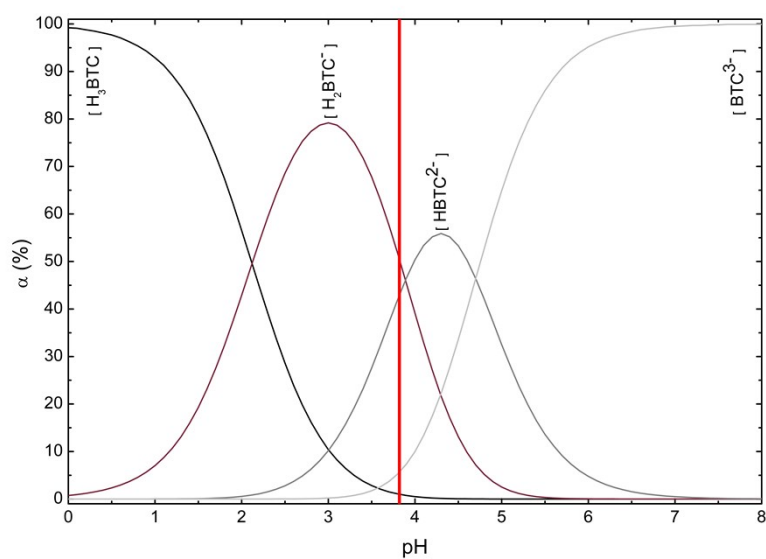

**Figure S8.** Speciation diagram of H<sub>3</sub>BTC in water at 298 K.

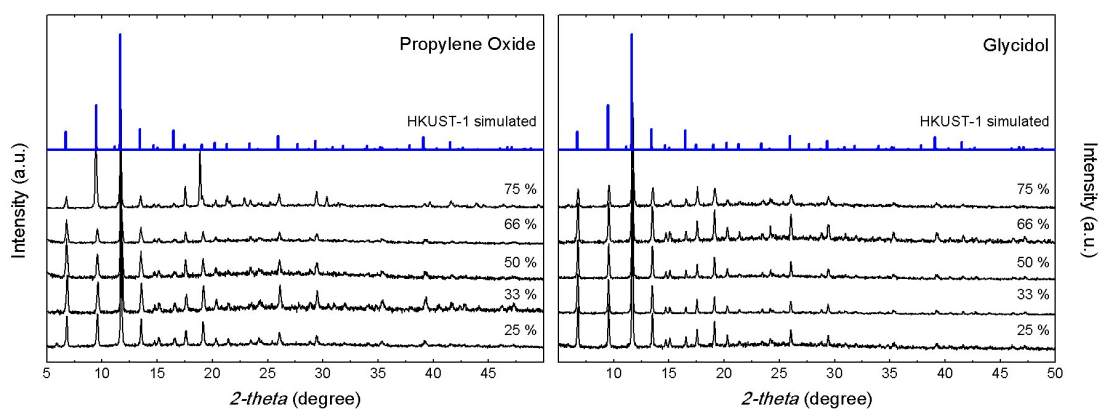

**Figure S9.** PXRD of samples prepared after aging EtOH:H<sub>2</sub>O mixtures with increasing water volume percentage (%) and  $[CuCl_2]_0=5$  mM,  $[H_3BTC]_0=3.3$  mM,  $[Epoxide]_0=500$  mM at 25 °C for 24 h.

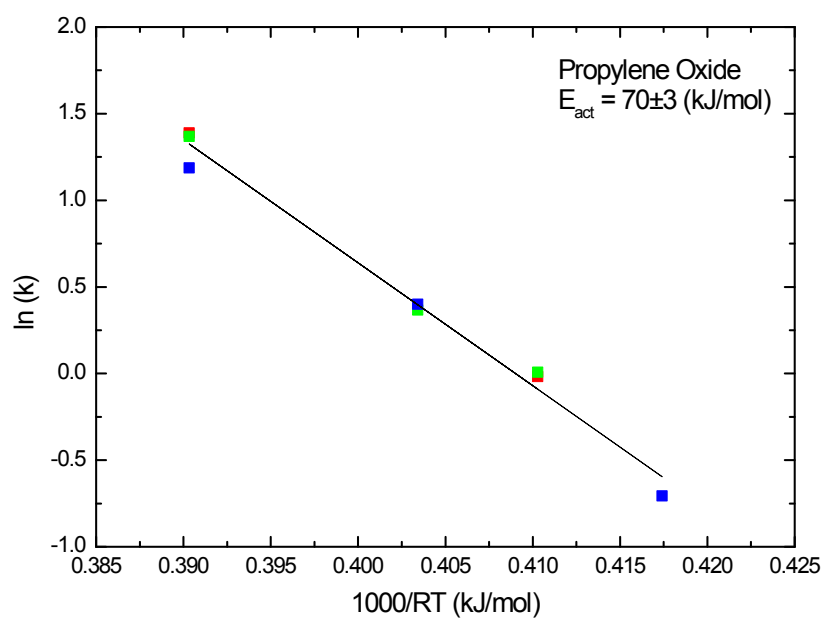

**Figure S10.** Alkalinization rate constant,  $k$ , as a function of the inverse of temperature recorded in a water solution containing propylene oxide (PO) 100 mM and NaCl 100 mM (red), 150 mM (green) or 300 mM (blue)

**Table S2.** Compilation of eco efficiency parameters.

| Ref.          | Cu(II) source                                          | STY<br>Kg m <sup>-3</sup> d <sup>-1</sup> | sEF | cEF  | SI+WI<br>Kg <sub>sv</sub> /Kg<br>MOF | Solvent<br>Intensity | Water<br>Intensity | Reaction<br>Mass<br>Efficiency | Mass<br>Intensity | H <sub>3</sub> BTC<br>excess |
|---------------|--------------------------------------------------------|-------------------------------------------|-----|------|--------------------------------------|----------------------|--------------------|--------------------------------|-------------------|------------------------------|
| 7             | Cu(OH) <sub>2</sub>                                    | 1842                                      | 0,5 | 28   | 27                                   | 18                   | 8,9                | 3,5 %                          | 29                | 33 %                         |
| 8             | Cu(CH <sub>3</sub> COO) <sub>2</sub> .H <sub>2</sub> O | 2035                                      | 2,1 | 1192 | 1190                                 | -                    | 1190               | 0,1 %                          | 1193              | 133 %                        |
| 10            | Cu(OH) <sub>2</sub>                                    | 144000                                    | 0,2 | 0,7  | 0,5                                  | 0,5                  | -                  | 58 %                           | 1,7               | 0 %                          |
| CuBTC*        | CuCl <sub>2</sub> .2H <sub>2</sub> O                   | 210000*                                   | 1,4 | 3,0  | 1,6                                  | -                    | 1,6                | 42 %                           | 3,2               | 0 %                          |
| PW-<br>CuBTC* | CuCl <sub>2</sub> .2H <sub>2</sub> O                   | 2570000*                                  | 0,6 | 1,2  | 0,7                                  | -                    | 0,7                | 64%                            | 1,9               | 0 %                          |

\* This work

Definitions of parameters

|                               |                                                                                                                |
|-------------------------------|----------------------------------------------------------------------------------------------------------------|
| Space-Time Yield              | $STY = \frac{Kg_{product}}{m_{reactor}^3 \cdot day_{reaction}}$                                                |
| Simple Environmental Factor   | $sEF = \frac{\Sigma(m_{raw\ materials} + m_{reagents} - m_{product})}{m_{product}}$                            |
| Complete Environmental Factor | $cEF = \frac{\Sigma(m_{raw\ materials} + m_{reagents} + m_{solvents} + m_{water} - m_{product})}{m_{product}}$ |
| Solvent Intensity             | $SI = \frac{m_{solvents\ (excluding\ water)}}{m_{product}}$                                                    |
| Water Intensity               | $WI = \frac{m_{water}}{m_{product}}$                                                                           |
| Total solvent demand          | $SI + WI = \frac{m_{solvents} + m_{water}}{m_{product}}$                                                       |
| Reaction Mass Efficiency      | $RME = \frac{m_{product}}{m_{all\ reactants}} \cdot 100\%$                                                     |
| Mass Intensity                | $MI = \frac{m_{materials\ (including\ water)}}{m_{product}}$                                                   |
